# Supplementary material for: Impacts 2 years after a scalable early childhood development intervention to increase psychosocial stimulation in the home: A follow-up of a cluster randomised controlled trial in Colombia
Source: PubMed Central journal article supplement (PMC5915272; doi:10.1371/journal.pmed.1002556), 2018-04-24
Supplement: pmed.1002556.s009.pdf [file pmed.1002556.s009.pdf]

| Domain                                                                                                                              | Function assessed                     | Instrument                            | Scoring Method |
|-------------------------------------------------------------------------------------------------------------------------------------|---------------------------------------|---------------------------------------|----------------|
| <b>A. Primary Outcome: Child Development</b>                                                                                        |                                       |                                       |                |
| <b>Measures of cognition, language, school readiness and executive functioning, directly assessed in a centre by a psychologist</b> |                                       |                                       |                |
| Cognition                                                                                                                           | Fluid Reasoning                       | WM Cognitive 5: Concept Formation     | IRT            |
|                                                                                                                                     | Processing Speed                      | WM Cognitive 6: Visual Matching       | NC             |
|                                                                                                                                     | Long-term Retrieval                   | WM Cognitive 12: Retrieval Fluency    | NC             |
|                                                                                                                                     | Visual-Spatial Thinking               | WM Cognitive 13: Picture Recognition  | GRM            |
|                                                                                                                                     | Processing Speed                      | WM Cognitive 16: Decision Speed       | NC             |
|                                                                                                                                     | Short Term Memory                     | WM Cognitive 21: Memory for Names     | IRT            |
| Language                                                                                                                            | Expressive Language                   | WM Achievement 14: Picture Vocabulary | IRT            |
|                                                                                                                                     | Receptive Language                    | TVIP                                  | IRT            |
| School Readiness                                                                                                                    | School Readiness                      | Daberon-2                             | IRT            |
| Executive Functioning                                                                                                               | Inhibitory Control and Working Memory | Pencil Tapping Task                   | NC             |
| <b>Measures of children's behaviour, collected in the home by parental report (interviewer)</b>                                     |                                       |                                       |                |
| Behaviour                                                                                                                           | Hyperactivity <sup>†</sup>            | SDQ Hyperactivity                     | GRM            |
|                                                                                                                                     | Emotional Symptoms <sup>†</sup>       | SDQ Emotional Symptoms                | GRM            |
|                                                                                                                                     | Conduct Problems <sup>†</sup>         | SDQ Conduct Problems                  | GRM            |
|                                                                                                                                     | Peer Problems <sup>†</sup>            | SDQ Peer Problems                     | GRM            |
|                                                                                                                                     | Prosocial Behaviour                   | SDQ Prosocial                         | GRM            |
|                                                                                                                                     | Total Difficulties <sup>1</sup>       | SDQ Total Difficulties                | GRM            |
|                                                                                                                                     | Attentional Focusing                  | CBQ Attentional Focusing              | GRM            |
|                                                                                                                                     | Inhibitory Control                    | CBQ Inhibitory Control                | GRM            |
| <b>B. Secondary Outcomes: Stimulation in the Home Environment</b>                                                                   |                                       |                                       |                |
|                                                                                                                                     | Variety of Play Activities            | FCI Play Activities                   | GRM            |
|                                                                                                                                     | Variety of Play Materials             | FCI Play Materials                    | GRM            |
|                                                                                                                                     | Maternal Depressive Symptoms          | CES-D 10                              | GRM            |

**S1 Table: Measures of Primary and Secondary Outcomes.** Columns 1 and 2 present the domain and function assessed, as given in the test manual. Column 3 presents the instrument used. Column 4 presents the method used to score the instrument: IRT =2-parameter Item Response Theory model, GRM=Graded Response Model, NC=Number Correct. WM =Woodcock-Muñoz, TVIP =Test de Vocabulario en Imágenes de Peabody, SDQ =Strengths and Difficulties Questionnaire, CBQ =Child Behaviour Questionnaire, FCI =Family Care Indicators, CES-D 10 = 10-item Center for Epidemiologic Studies short depression scale. <sup>†</sup>Measure scored such that higher values indicate more problems/lower levels of behavioural development. <sup>1</sup>Total Difficulties subscale contains items from SDQ subscales: Hyperactivity, Emotional Symptoms, Conduct Problems and Peer Problems.
