# Supplementary material for: Impacts 2 years after a scalable early childhood development intervention to increase psychosocial stimulation in the home: A follow-up of a cluster randomised controlled trial in Colombia
Source: PubMed Central journal article supplement (PMC5915272; doi:10.1371/journal.pmed.1002556), 2018-04-24
Supplement: pmed.1002556.s010.pdf [file pmed.1002556.s010.pdf]

| <b>Attrition at 2 year follow-up</b>             |                           |                              |
|--------------------------------------------------|---------------------------|------------------------------|
| <b>Stimulation</b>                               | 0.02<br>(-0.03 to 0.07)   | 0.01<br>(-0.04 to 0.06)      |
| <b>Supplementation</b>                           | 0.04<br>(-0.02 to 0.09)   | 0.03<br>(-0.02 to 0.09)      |
| <b>Stimulation and Supplementation</b>           | 0.05*<br>(-0.01 to 0.11)  | 0.06*<br>(-0.00 to 0.11)     |
| <b>Baseline Age in Months</b>                    |                           | 0.00<br>(-0.00 to 0.00)      |
| <b>Baseline Cognition (Bayley-III)</b>           |                           | 0.01<br>(-0.01 to 0.03)      |
| <b>Baseline Receptive Language (Bayley-III)</b>  |                           | -0.02*<br>(-0.03 to 0.00)    |
| <b>Baseline Expressive Language (Bayley-III)</b> |                           | -0.00<br>(-0.02 to 0.02)     |
| <b>Baseline Fine Motor (Bayley-III)</b>          |                           | 0.00<br>(-0.01 to 0.02)      |
| <b>Baseline Gross Motor (Bayley-III)</b>         |                           | -0.00<br>(-0.02 to 0.02)     |
| <b>Male</b>                                      |                           | -0.05***<br>(-0.08 to -0.01) |
| <b>Constant</b>                                  | 0.09***<br>(0.05 to 0.13) | 0.11**<br>(0.02 to 0.20)     |
| <b>Observations</b>                              | 1,419                     | 1,417                        |
| <b>R-squared</b>                                 | 0.004                     | 0.011                        |

**S2 Table: Differential Attrition by Treatment Status and Baseline Characteristics.** Table displays results from an OLS regression of a binary indicator =1 if the child attrited from the sample at this follow-up on treatment indicators, baseline characteristics and a constant term. \*p<0.10, \*\*p<0.05, \*\*\*p<0.01: 2-tailed p-values for difference of regression coefficient from zero. 95% CIs (in parentheses) and P-values adjusted for clustering at the town level. Baseline Bayley-III scores standardised non-parametrically for age and scaled to have zero mean and unit variance in the control group.
