# Supplementary material for: Impacts 2 years after a scalable early childhood development intervention to increase psychosocial stimulation in the home: A follow-up of a cluster randomised controlled trial in Colombia
Source: PLoS Med. 2018 Apr 24;15(4):e1002556. doi: 10.1371/journal.pmed.1002556 (PMC5915272; doi:10.1371/journal.pmed.1002556)
Supplement: S3 Table — (PDF) [file pmed.1002556.s011.pdf]

| Domain                       | Instrument                                  | Factor 1<br>(rotated)<br>Loading | Factor 2<br>(rotated)<br>Loading |
|------------------------------|---------------------------------------------|----------------------------------|----------------------------------|
| <b>Cognition</b>             | WM Visual Matching                          | 0.62                             | 0.12                             |
|                              | WM Retrieval Fluency                        | 0.40                             | 0.08                             |
|                              | WM Picture Recognition                      | 0.52                             | 0.03                             |
|                              | WM Decision Speed                           | 0.56                             | 0.14                             |
|                              | WM Memory for Names                         | 0.61                             | 0.09                             |
| <b>Language</b>              | WM Expressive Language                      | 0.71                             | 0.03                             |
|                              | TVIP (Receptive Language)                   | 0.81                             | 0.08                             |
| <b>School Readiness</b>      | Daberon-2 (School Readiness)                | 0.82                             | 0.16                             |
| <b>Executive Functioning</b> | PTT (Inhibitory Control and Working Memory) | 0.46                             | 0.11                             |
| <b>Behaviour</b>             | SDQ Hyperactivity <sup>†</sup>              | -0.10                            | -0.64                            |
|                              | SDQ Emotional Symptoms <sup>†</sup>         | -0.08                            | -0.25                            |
|                              | SDQ Conduct Problems <sup>†</sup>           | -0.12                            | -0.58                            |
|                              | SDQ Peer Problems <sup>†</sup>              | -0.15                            | -0.21                            |
|                              | SDQ Prosocial Behaviour                     | 0.12                             | 0.44                             |
|                              | CBQ Attention Focusing                      | 0.12                             | 0.71                             |
|                              | CBQ Inhibitory Control                      | 0.12                             | 0.70                             |
| <b>Eigenvalue</b>            |                                             | <b>4.081</b>                     | <b>1.679</b>                     |

**Table S3: Exploratory Factor Analysis of Child Development Measures.** Exploratory factor analysis. 2 factors retained and rotated using Kaiser criterion. <sup>†</sup>Measure scored such that higher values indicate more problems/lower levels of behavioural development. Scoring of all measures outlined in S1 Table.
